# Supplementary material for: Technological quality and fungal community of Kombucha fermented with hemp leaves and milky mushroom flour (Calocybe indica)
Source: PeerJ. 2024 Sep 26;12:e18116. doi: 10.7717/peerj.18116 (PMC11439377; doi:10.7717/peerj.18116)
Supplement: Supplemental Information 1 [file peerj-12-18116-s001.xlsx]

## Sheet: pH&Brix
T1 is Kombucha production by red tea, sucrose, pandan leaves, dried hemp leaves
T2 is Kombucha production by red tea, sucrose, pandan leaves, dried hemp leaves, milky mushroom flour
Treatment	Measurre	Rep.	Fermentation times (days)				superscript: T1, T2
			0	7	14	21	0	7	14	21
T1	pH	1	4.72	4.68	3.9	3.5
		2	4.75	4.55	3	3.7
		3	4.69	4.67	4.35	3.7
		AVR	4.72	4.63333	3.75	3.63333	a	a	b	b
		SD	0.03	0.0723418	0.687386	0.11547
T2		1	4.75	4.65	3.75	3.4
		2	4.77	4.66	3.5	3.3
		3	4.81	4.5	3.5	3
		AVR	4.77667	4.60333	3.58333	3.23333	a	a	b	c
		SD	0.0305505	0.0896289	0.144338	0.208167
T1	Brix	1	10	10	9.7	7.1
		2	10	10	9.5	7
		3	10	9	8	6.8
		AVR	10	9.66667	9.06667	6.96667	a	a	a	b
		SD	0	0.57735	0.929157	0.152753
T2		1	10.2	9.7	9.2	8
		2	10.2	9.5	9	9
		3	9.8	9	8.5	8
		AVR	10.0667	9.4	8.9	8.33333	a	ab	bc	c
		SD	0.23094	0.360555	0.360555	0.57735
note brix = total soluble solid
note Rep. = Replicate
		ANOVA							pH
		pH: T1							Duncana T1
			Sum of Squares	df	Mean Square	F	Sig.		T1	N	Subset for alpha = 0.05
		Between Groups	2.942	3	0.981	7.974	0.009				1	2
		Within Groups	0.984	8	0.123				21	3	3.6333
		Total	3.926	11					14	3	3.75
									7	3		4.6333
									0	3		4.72
									Sig.		0.694	0.77
									Means for groups in homogeneous subsets are displayed.
									a. Uses Harmonic Mean Sample Size = 3.000.
		ANOVA							pH
		pH: T2							Duncana T2
			Sum of Squares	df	Mean Square	F	Sig.		T2	N	Subset for alpha = 0.05
		Between Groups	5.157	3	1.719	94.017	<.001				1	2	3
		Within Groups	0.146	8	0.018				21	3	3.2333
		Total	5.303	11					14	3		3.5833
									7	3			4.6033
									0	3			4.7767
									Sig.		1	1	0.155
									Means for groups in homogeneous subsets are displayed.
									a. Uses Harmonic Mean Sample Size = 3.000.
		ANOVA							Brix
		Brix: T1							Duncana T1
			Sum of Squares	df	Mean Square	F	Sig.		T1	N	Subset for alpha = 0.05
		Between Groups	16.683	3	5.561	18.232	<.001				1	2
		Within Groups	2.44	8	0.305				21	3	6.9667
		Total	19.123	11					14	3		9.0667
									7	3		9.6667
									0	3		10
									Sig.		1	0.082
									Means for groups in homogeneous subsets are displayed.
									a. Uses Harmonic Mean Sample Size = 3.000.
									Brix
									Duncana T2
		ANOVA							T2	N	Subset for alpha = 0.05
		Brix: T2									1	2	3
			Sum of Squares	df	Mean Square	F	Sig.		21	3	8.3333
		Between Groups	4.889	3	1.63	10.081	0.004		14	3	8.9	8.9
		Within Groups	1.293	8	0.162				7	3		9.4	9.4
		Total	6.182	11					0	3			10.0667
									Sig.		0.123	0.166	0.077
									Means for groups in homogeneous subsets are displayed.
									a. Uses Harmonic Mean Sample Size = 3.000.

## Sheet: M.O. count
T1 is Kombucha production by red tea, sucrose, pandan leaves, dried hemp leaves
T2 is Kombucha production by red tea, sucrose, pandan leaves, dried hemp leaves, milky mushroom flour
Treatment	fermentation time (days)	Total viable count (log CFU/ml)
		Rep.	Rep.	Rep.	AVR	SD	superscript
T1	0	3.5	3.6	4	3.7	0.264575	ab
	7	4	4.1	3.85	3.98333	0.125831	a
	14	3	3	3.67	3.22333	0.386825	bc
	21	3	3.4	3	3.13333	0.23094	c
T2	0	4	3.6	4	3.86667	0.23094	a
	7	3.85	3.56	3.94	3.78333	0.198578	a
	14	3.05	3.24	3	3.09667	0.126623	b
	21	3	3	3	3	0	b
Treatment	fermentation time (days)	Total lactic acid bacteria (log CFU/ml)
		Rep.	Rep.	Rep.	AVR	SD
T1	0	5.47	5.46	5.3	5.41	0.113137	b
	7	5.3	5.6	5.6	5.5	0	b
	14	6.82	6.73	6.81	6.78667	0.0565685	a
	21	6.83	6.82	6.77	6.80667	0.0353553	a
T2	0	5.25	5.39	5.3	5.31333	0.0636396	b
	7	5	6.07	6.39	5.82	0.226274	b
	14	6.47	6.76	6.87	6.7	0.0777817	a
	21	6.5	6.6	6.7	6.6	0.0707107	a
Treatment	fermentation time (days)	Total yeast&mold (log CFU/ml)
		Rep.	Rep.	Rep.	AVR	SD
T1	0	3.47	3.9	3.69	3.68667	0.215019	c
	7	6.14	6.2	6.17	6.17	0.03	b
	14	6.5	6	6.14	6.21333	0.257941	b
	21	7.84	7.82	7.69	7.78333	0.0814453	a
T2	0	3.69	3.6	3.9	3.73	0.153948	c
	7	6.8	6.87	6.85	6.84	0.0360555	b
	14	6.92	6.97	6.95	6.94667	0.0251661	b
	21	7.89	7.88	7.7	7.82333	0.106927	a
																				TVC
ANOVA							TVC						ANOVA							Duncana T2
TVC: T1							Duncana T1						TVC: T2							T2	N	Subset for alpha = 0.05
	Sum of Squares	df	Mean Square	F	Sig.		T1	N	Subset for alpha = 0.05					Sum of Squares	df	Mean Square	F	Sig.				1	2
Between Groups	1.453	3	0.484	6.706	0.014				1	2	3		Between Groups	1.834	3	0.611	22.476	<.001		21	3	3
Within Groups	0.578	8	0.072				21	3	3.1333				Within Groups	0.218	8	0.027				14	3	3.0967
Total	2.03	11					14	3	3.2233	3.2233			Total	2.052	11					7	3		3.7833
							0	3		3.7	3.7									0	3		3.8667
							7	3			3.9833									Sig.		0.493	0.553
							Sig.		0.692	0.062	0.233									Means for groups in homogeneous subsets are displayed.
							Means for groups in homogeneous subsets are displayed.													a. Uses Harmonic Mean Sample Size = 3.000.
							a. Uses Harmonic Mean Sample Size = 3.000.
													ANOVA							LAB
ANOVA							LAB						LAB: T2							Duncana T2
LAB: T1							Duncana T1							Sum of Squares	df	Mean Square	F	Sig.		T2	N	Subset for alpha = 0.05
	Sum of Squares	df	Mean Square	F	Sig.		T1	N	Subset for alpha = 0.05				Between Groups	3.816	3	1.272	8.849	0.006				1	2
Between Groups	5.413	3	1.804	169.552	<.001				1	2			Within Groups	1.15	8	0.144				0	3	5.3133
Within Groups	0.085	8	0.011				0	3	5.41				Total	4.966	11					7	3	5.82
Total	5.498	11					7	3	5.5											21	3		6.6
							14	3		6.7867										14	3		6.67
							21	3		6.8067										Sig.		0.14	0.827
							Sig.		0.316	0.818										Means for groups in homogeneous subsets are displayed.
							Means for groups in homogeneous subsets are displayed.													a. Uses Harmonic Mean Sample Size = 3.000.
							a. Uses Harmonic Mean Sample Size = 3.000.
													ANOVA							YM
ANOVA							YM						YM: T2							Duncana T2
YM: T1							Duncana T1							Sum of Squares	df	Mean Square	F	Sig.		T1	N	Subset for alpha = 0.05
	Sum of Squares	df	Mean Square	F	Sig.		T1	N	Subset for alpha = 0.05				Between Groups	28.891	3	9.63	1039.24	<.001				1	2	3
Between Groups	26.192	3	8.731	310.982	<.001				1	2	3		Within Groups	0.074	8	0.009				0	3	3.73
Within Groups	0.225	8	0.028				0	3	3.6867				Total	28.965	11					7	3		6.84
Total	26.417	11					7	3		6.17										14	3		6.9467
							14	3		6.4133										21	3			7.8233
							21	3			7.7833									Sig.		1	0.212	1
							Sig.		1	0.113	1									Means for groups in homogeneous subsets are displayed.
							Means for groups in homogeneous subsets are displayed.													a. Uses Harmonic Mean Sample Size = 3.000.
							a. Uses Harmonic Mean Sample Size = 3.000.

## Sheet: Phenolic
T1 is Kombucha production by red tea, sucrose, pandan leaves, dried hemp leaves
T2 is Kombucha production by red tea, sucrose, pandan leaves, dried hemp leaves, milky mushroom flour
Absorbance of standard gallic acid
concentration	Rep.	Rep.	Rep.	AVR
0	0	0	0	0
50	0.194	0.194	0.193	0.193667
100	0.416	0.416	0.415	0.415667
150	0.518	0.516	0.515	0.516333
	Total phenolic content (mg GAE/ml)
T1	Rep1	Rep2	Rep3	AVR	SD	superscript	T2	Rep1	Rep2	Rep3	AVR	SD	superscript
0	92.21	91.93	91.93	92.0233	0.161658	d	0	124.71	124.99	124.71	124.803	0.161658	c
7	119.71	119.71	119.71	119.71	0	c	7	123.88	126.93	124.43	125.08	1.62558	c
14	124.99	124.43	124.43	124.617	0.323316	b	14	131.93	139.43	154.15	141.837	11.3038	b
21	129.99	129.43	129.15	129.523	0.427707	a	21	156.1	155.82	155.82	155.913	0.161658	a
concentration of totalphenolic acid was calculated from gallic acid standard equation
	abs. at 750 nm							abs. at 750 nm
T1	Rep.1	Rep.2	Rep.3	AVR	SD		T2	Rep.1	Rep.2	Rep.3	AVR	SD
0	0.332	0.331	0.331	0.331333	0.00057735		0	0.446	0.457	0.448	0.450333	0.00585947
7	0.431	0.431	0.431	0.431	0		7	0.446	0.457	0.448	0.450333	0.00585947
14	0.45	0.448	0.448	0.448667	0.0011547		14	0.475	0.502	0.555	0.510667	0.0406981
21	0.468	0.466	0.465	0.466333	0.00152753		21	0.562	0.561	0.56	0.561	0.001
ANOVA							TPC
TPC: T1							Duncana T1
	Sum of Squares	df	Mean Square	F	Sig.		T1	N	Subset for alpha = 0.05
Between Groups	2534.68	3	844.895	10776.7	<.001				1	2	3	4
Within Groups	0.627	8	0.078				0	3	92.0233
Total	2535.31	11					7	3		119.71
							14	3			124.617
							21	3				129.523
							Sig.		1	1	1	1
							Means for groups in homogeneous subsets are displayed.
							a. Uses Harmonic Mean Sample Size = 3.000.
ANOVA							TPC
TPC: T2							Duncana T2
	Sum of Squares	df	Mean Square	F	Sig.		T2	N	Subset for alpha = 0.05
Between Groups	2015.76	3	671.919	20.6	<.001				1	2	3
Within Groups	260.942	8	32.618				0	3	124.803
Total	2276.7	11					7	3	125.08
							14	3		141.837
							21	3			155.913
							Sig.		0.954	1	1
							Means for groups in homogeneous subsets are displayed.
							a. Uses Harmonic Mean Sample Size = 3.000.

## Sheet: Flavonoids
T1 is Kombucha production by red tea, sucrose, pandan leaves, dried hemp leaves
T2 is Kombucha production by red tea, sucrose, pandan leaves, dried hemp leaves, milky mushroom flour
Absorbance of standard Catechin
concentration	Rep.1	Rep.2	Rep.3	AVS	SD
0	0	0	0	0	0
0.2	0.023	0.024	0.023	0.0233333	0.00057735
0.4	0.06	0.06	0.06	0.06	0
0.6	0.109	0.109	0.107	0.108333	0.0011547
0.8	0.154	0.154	0.153	0.153667	0.00057735
1	0.178	0.178	0.179	0.178333	0.00057735
	Total flavonoids content (mg CE/ml)
T1	Rep1	Rep2	Rep3	AVR	SD	superscript	T2	Rep1	Rep2	Rep3	AVR	SD	superscript
0	0.62	0.64	0.62	0.626667	0.011547	c	0	0.81	0.78	0.72	0.77	0.0458258	c
7	0.86	0.86	0.85	0.856667	0.0057735	a	7	0.94	0.91	0.95	0.933333	0.0208167	b
14	0.65	0.7	0.68	0.676667	0.0251661	b	14	0.94	0.95	0.98	0.956667	0.0208167	ab
21	0.66	0.71	0.7	0.69	0.0264575	b	21	1.04	0.97	1.02	1.01	0.0360555	a
concentration of total flavonoid was calculated from catechin equation
Abs. at 510 nm of T1									Abs. at 510 nm of T2
days	Rep1	Rep2	Rep3	AVR	SD				days	Rep1	Rep2	Rep3	AVR	SD
0	0.117	0.121	0.118	0.118667	0.00208167				0	0.154	0.148	0.138	0.146667	0.0080829
7	0.165	0.164	0.162	0.163667	0.00152753				7	0.179	0.174	0.181	0.178	0.00360555
14	0.124	0.133	0.129	0.128667	0.00450925				14	0.179	0.181	0.188	0.182667	0.00472582
21	0.126	0.136	0.134	0.132	0.0052915				21	0.198	0.185	0.194	0.192333	0.00665833
ANOVA								TFC
TFC: T1								Duncana T1
	Sum of Squares	df	Mean Square	F	Sig.			T1	N	Subset for alpha = 0.05
Between Groups	0.09	3	0.03	79.844	<.001					1	2	3
Within Groups	0.003	8	0					0	3	0.6267
Total	0.093	11						14	3		0.6767
								21	3		0.69
								7	3			0.8567
								Sig.		1	0.424	1
								Means for groups in homogeneous subsets are displayed.
								a. Uses Harmonic Mean Sample Size = 3.000.
ANOVA								TFC
TFC: T2								Duncana T2
	Sum of Squares	df	Mean Square	F	Sig.			T2	N	Subset for alpha = 0.05
Between Groups	0.096	3	0.032	30.091	<.001					1	2	3
Within Groups	0.009	8	0.001					0	3	0.77
Total	0.105	11						7	3		0.9333
								14	3		0.9567	0.9567
								21	3			1.01
								Sig.		1	0.407	0.081
								Means for groups in homogeneous subsets are displayed.
								a. Uses Harmonic Mean Sample Size = 3.000.

## Sheet: %RSA
T1 is Kombucha production by red tea, sucrose, pandan leaves, dried hemp leaves
T2 is Kombucha production by red tea, sucrose, pandan leaves, dried hemp leaves, milky mushroom flour
Abs at 517 nm of sample
sample or treatment	Rep.1	Rep.2	Rep.3	AVS	SD
control	0.946	0.955	0.942	0.947667	0.00665833	A0
5 galic	0.994	0.992	0.991	0.992333	0.00152753
10 galic	0.869	0.868	0.866	0.867667	0.00152753
20 galic	0.661	0.659	0.657	0.659	0.002
30 galic	0.377	0.375	0.371	0.374333	0.00305505	%RSA
40 galic	0.136	0.136	0.137	0.136333	0.00057735	Rep 1	Rep 2	Rep 3	AVG	SD
50 mg galic	0.121	0.12	0.119	0.12	0.001						superscript
T1-0	0.1	0.098	0.098	0.0986667	0.0011547	89.45	89.66	89.66	89.59	0.121244	c
T1-7	0.095	0.097	0.095	0.0956667	0.0011547	89.97	89.77	89.99	89.91	0.121655	bc
T1-14	0.094	0.092	0.091	0.0923333	0.00152753	90.08	90.3	90.4	90.26	0.163707	b
T1-21	0.07	0.077	0.082	0.0763333	0.00602771	92.62	91.88	91.35	91.95	0.637887	a
T2-0	0.094	0.09	0.093	0.0923333	0.00208167	90.08	90.51	90.19	90.26	0.223383	b
T2-7	0.146	0.152	0.151	0.149667	0.00321455	84.6	83.97	84.07	84.2133	0.338575	d
T2-14	0.141	0.139	0.147	0.142333	0.00416333	85.12	85.34	84.49	84.9833	0.441173	c
T2-21	0.083	0.088	0.084	0.085	0.00264575	91.24	90.71	91.14	91.03	0.281603	a
							DPPH
ANOVA							Duncana T1
DPPH RSA: T1							T1	N	Subset for alpha = 0.05
	Sum of Squares	df	Mean Square	F	Sig.				1	2	3
Between Groups	9.749	3	3.25	28.98	<.001		0	3	89.59
Within Groups	0.897	8	0.112				7	3	89.9767	89.9767
Total	10.646	11					14	3		90.26
							21	3			91.95
							Sig.		0.195	0.33	1
							Means for groups in homogeneous subsets are displayed.
							a. Uses Harmonic Mean Sample Size = 3.000.
							DPPH
ANOVA							Duncana T2
DPPH RSA: T2							T2	N	Subset for alpha = 0.05
	Sum of Squares	df	Mean Square	F	Sig.				1	2	3	4
Between Groups	111.465	3	37.155	338.955	<.001		7	3	84.2133
Within Groups	0.877	8	0.11				14	3		84.9833
Total	112.342	11					0	3			90.26
							21	3				91.03
							Sig.		1	1	1	1
							Means for groups in homogeneous subsets are displayed.
							a. Uses Harmonic Mean Sample Size = 3.000.
