# Supplementary material for: Technological quality and fungal community of Kombucha fermented with hemp leaves and milky mushroom flour (Calocybe indica)
Source: PeerJ. 2024 Sep 26;12:e18116. doi: 10.7717/peerj.18116 (PMC11439377; doi:10.7717/peerj.18116)
Supplement: Supplemental Information 2 [file peerj-12-18116-s002.xlsx]

## Sheet: Relative abundance_Family
Family	T1/0	T1/14	T1/21	T2/0	T2/14	T2/21
f__Pichiaceae	0.0216149	0.64922	0.421553	0.00111163	0.840451	0.852617
f__Callistosporiaceae	0.138212	0	0.223962	0.937872	0.0115177	0.00367454
f__Rhizopodaceae	0.0456075	0.142195	0.116103	0.00135865	0.023622	0.0765169
f__Cladosporiaceae	0.0735217	0.0178478	0.0583604	0.00759611	0.00123514	0
f__Malasseziaceae	0.0622202	0.00148217	0.041161	0.000802841	0.0135557	0.000555813
f__Phaeosphaeriaceae	0.331295	0.000370542	0.027451	0.0251042	0.0951984	0
f__Monascaceae	0.00163656	0.0124132	0.0259997	0	0	0
f__Aspergillaceae	0.0171993	0.0351706	0.0214297	0.000339663	0.00355103	0.00398333
f__Mycosphaerellaceae	0.0842057	0.0331944	0.00846071	0.00876949	0	0.0159642
f__Marasmiaceae	0	0	0.00824456	0	0	0
f__Schizophyllaceae	0	0	0.0077505	0	0.00389069	0.00265555
f__Ophiostomataceae	0	0.0153775	0.00571252	0	0.000741084	0.0184653
f__Pestalotiopsidaceae	0.00339663	0	0.00463177	0.000864598	0	0
f__Tilletiaceae	0	0	0.00395245	0	0	0
f__Strelitzianaceae	0.0129381	0	0.00324224	0.000432299	0	0
f__Xylariaceae	0.00111163	0	0.00314961	0.000185271	0	0
f__Protomycetaceae	0.00457002	0	0.00277906	0.000123514	0	0
f__Dissoconiaceae	0.000771962	0	0.00234677	0	0	0
f__Bulleribasidiaceae	0.0469353	0	0.00225413	0.00228501	0	0
f__Filobasidiaceae	0.00469353	0	0.00160568	0	0	0
f__Spiculogloeaceae	0.00305697	0	0.00132778	0.000123514	0	0
f__Mucoraceae	0.0024394	0.0112706	0.00132778	0	0.000648448	0.00308785
f__Cerrenaceae	0.00426123	0	0.00126602	0	0	0
f__Wallemiaceae	0.00376718	0	0.00126602	0.000185271	0.000957233	0
f__Meruliaceae	0.000524934	0	0.000771962	0	0	0
f__Cordycipitaceae	0	0	0.000771962	0.00376718	0	0
f__Debaryomycetaceae	0.0135557	0.00314961	0.000710205	0.000741084	0.000216149	0
f__Acrocalymmaceae	0.00197622	0	0.000648448	3.08785e-05	0	0
f__Polyporaceae	0.00148217	0.00858422	0.000463177	0.000247028	0.00163656	0
f__Meripilaceae	0.00108075	0.00509495	0.000463177	0	0	0
f__Sporidiobolaceae	0.00274819	0	0.00040142	0.00040142	0	0
f__Irpicaceae	0	0	0.000277906	0	0	0
f__Cucurbitariaceae	0.00524934	0	0.000154392	0.000524934	0	0
f__Pleosporaceae	0.0117338	0.0170449	0	0.00151305	0	0
f__Trichosphaeriaceae	0.0100664	0.0187741	0	0	0	0
f__Ustilaginaceae	0.00951058	0	0	0.000648448	0	0
f__Nectriaceae	0.00713293	0	0	3.08785e-05	0	0
f__Chaetothyriales_fam_Incertae_sedis	0.00707117	0	0	0	0	0
f__Sporocadaceae	0.00583604	0	0	0	0	0
f__Stachybotryaceae	0.00472441	0	0	0	0	0
f__Aporpiaceae	0.00457002	0	0	0.000710205	0	0
f__Herpotrichiellaceae	0.00450826	0	0	0.000123514	0	0
f__Didymosphaeriaceae	0.00435387	0	0	0.000308785	0	0.0177243
f__Brachybasidiaceae	0.00265555	0	0	0.00040142	0	0
f__Cystobasidiaceae	0.00240852	0	0	0	0	0
f__Rhynchogastremataceae	0.00234677	0	0	0	0	0
f__Chaetothyriaceae	0.00225413	0	0	3.08785e-05	0	0
f__Pezizomycotina_fam_Incertae_sedis	0.00216149	0	0	0	0	0
f__Ruineniaceae	0.00209974	0	0	0	0	0
f__Helotiaceae	0.00185271	0	0	0.000185271	0	0
f__Periconiaceae	0.00179095	0	0	0	0	0
f__Cortinariaceae	0.0012969	0	0	0	0	0
f__Xenodevriesiaceae	0.00126602	0	0	0.000123514	0	0
f__Agaricales_fam_Incertae_sedis	0.00123514	0	0	0	0	0
f__Diaporthaceae	0.00123514	0	0	0	0	0
f__Microascaceae	0.0011425	0	0	0	0	0
f__Trichomeriaceae	0.000988112	0	0	0	0	0
f__Zeloasperisporiaceae	0.000926355	0	0	0	0	0
f__Amphisphaeriaceae	0.000864598	0	0	9.26355e-05	0	0
f__Botryobasidiaceae	0.000864598	0	0	0	0	0
f__Kondoaceae	0.000864598	0	0	0	0	0
f__Meliolaceae	0.000864598	0	0	0	0	0
f__Lophiostomataceae	0.000802841	0	0	0.000154392	0	0
f__Stereaceae	0.000771962	0	0	0	0	0
f__Tetraplosphaeriaceae	0.000741084	0	0	0	0	0
f__Cystobasidiales_fam_Incertae_sedis	0.000710205	0	0	0	0	0
f__Hyaloscyphaceae	0.000710205	0	0	0	0	0
f__Schizoporaceae	0.000710205	0	0	0	0	0
f__Ustilentylomataceae	0.000710205	0	0	0	0	0
f__Pilocarpaceae	0.000679327	0	0	0	0	0
f__Erythrobasidiaceae	0.000648448	0	0	0	0	0
f__Neodevriesiaceae	0.00061757	0	0	0	0	0
f__Stictidaceae	0.000586691	0	0	0	0	0
f__Carcinomycetaceae	0.000524934	0	0	0	0	0
f__Trichosporonaceae	0.000524934	0	0	0	0	0
f__Teratosphaeriaceae	0.000494056	0.00802841	0	0.000308785	0	0
f__Agaricostilbaceae	0.000432299	0	0	0	0	0
f__Tzeananiaceae	0.000370542	0	0	0.000370542	0	0
f__Phaffomycetaceae	0.000339663	0	0	0	0	0
f__Bulleraceae	0.000277906	0	0	0	0	0
f__Pyronemataceae	0.000247028	0	0	0.000339663	0	0
f__Cryptococcaceae	0.000216149	0	0	0	0	0
f__Ramalinaceae	0.000185271	0	0	0	0	0
f__Pyriculariaceae	0	0	0	0	0	0.00475529
f__Hymenochaetales_fam_Incertae_sedis	0	0	0	0	0.00120426	0
f__Bionectriaceae	0	0	0	0	0.000802841	0
f__Auriculariaceae	0	0	0	0	0.00040142	0
f__Diatrypaceae	0	0	0	0	0.000370542	0
f__Saccharomycetales_fam_Incertae_sedis	0	0	0	0.000185271	0	0
f__Microstromatales_fam_Incertae_sedis	0	0	0	0.000154392	0	0
f__Pannariaceae	0	0	0	0.000154392	0	0
f__Cyphellaceae	0	0	0	0.000123514	0	0
f__Erysiphaceae	0	0	0	0.000123514	0	0
f__Pleosporales_fam_Incertae_sedis	0	0	0	0.000123514	0	0
f__Sirobasidiaceae	0	0	0	0.000123514	0	0
f__Sympoventuriaceae	0	0	0	0.000123514	0	0
f__Torulaceae	0	0	0	0.000123514	0	0
f__Trichomonascaceae	0	0	0	0.000123514	0	0
f__Choanephoraceae	0	0	0	9.26355e-05	0	0
f__Golubeviaceae	0	0	0	9.26355e-05	0	0
f__Rhytismataceae	0	0	0	9.26355e-05	0	0
f__Niessliaceae	0	0	0	6.1757e-05	0	0
f__Symmetrosporaceae	0	0	0	6.1757e-05	0	0
f__Mycenaceae	0	0	0	3.08785e-05	0	0
f__Lachnocladiaceae	0	0.00944882	0	0	0	0
f__Steccherinaceae	0	0.00858422	0	0	0	0
f__Trimorphomycetaceae	0	0.00271731	0	0	0	0
f__Didymellaceae	0	3.08785e-05	0	0	0	0

## Sheet: Relative abundance_Genus
Genus	T1/0	T1/14	T1/21	T2/0	T2/14	T2/21
g__Dekkera	0.0135355	0.506728	0.301572	0.000591477	0.753523	0.739892
g__Macrocybe	0.148858	0	0.277436	0.945522	0.0179422	0.00670121
g__Rhizopus	0.0491204	0.209356	0.143824	0.00136974	0.0367983	0.139543
g__Cladosporium	0.0781203	0.0262775	0.0722947	0.00765806	0.00192409	0
g__Malassezia	0.0663474	0.00218221	0.041732	0.000778259	0.0211169	0.00101363
g__Monascus	0.00176261	0.0182761	0.0322075	0	0	0
g__Setophoma	0.259104	0.000545554	0.0225682	0.0187093	0	0
g__Neocarpenteles	0	0.0192762	0.0174043	0	0.00221271	0
g__Schizophyllum	0	0	0.00960104	0	0.0060609	0.00484289
g__Malasseziaceae_gen_Incertae_sedis	0.000665137	0	0.00925678	3.11303e-05	0	0
g__Aspergillus	0.0185241	0.0231406	0.00914203	0.000217912	0.00331906	0.00726433
g__Phaeosphaeria	0.0712029	0	0.00807099	0.00404694	0	0
g__Sporothrix	0	0.0226405	0.00707646	0	0.00115446	0.033675
g__Neopestalotiopsis	0.00365825	0	0.00573767	0.000715998	0	0
g__Tilletia	0	0	0.00489615	0	0	0
g__Strelitziana	0.0139346	0	0.00401637	0.000435825	0	0
g__Zygosporium	0	0	0.00390162	0.000186782	0	0
g__Protomyces	0.00492201	0	0.0034426	0.000124521	0	0
g__Leptospora	0.00236124	0	0.0033661	9.3391e-05	0.1483	0
g__Uwebraunia	0	0	0.00290709	0	0	0
g__Hannaella	0.0398417	0	0.00279233	0.0020546	0	0
g__Filobasidium	0.00505504	0	0.00198906	0	0	0
g__Cercospora	0.00202867	0	0.00191256	0	0	0
g__Mucor	0.00262729	0.0165939	0.0016448	0	0.00101015	0.00563126
g__Phyllozyma	0.00329243	0	0.0016448	0.000124521	0	0
g__Wallemia	0.0016961	0	0.0015683	0.000186782	0	0
g__Pseudolagarobasidium	0.00458944	0	0.0015683	0	0	0
g__Hydnophlebia	0.000565366	0	0.000956279	0	0	0
g__Engyodontium	0	0	0.000956279	0	0	0
g__Meyerozyma	0.0145998	0.00463721	0.000879777	0.000747128	0.000336717	0
g__Acrocalymma	0.00212844	0	0.000803274	3.11303e-05	0	0
g__Pseudocercospora	0.00927866	0.0229587	0.00065027	0.000622607	0	0.0291136
g__Rigidoporus	0.00116399	0	0.000573767	0	0	0
g__Rhodosporidiobolus	0.0016961	0	0.000497265	0	0	0
g__Megasporoporia	0	0	0.000382512	0	0	0
g__Ceriporia	0	0	0.00034426	0	0	0
g__Pyrenochaetopsis	0.00565366	0	0.000191256	0.000529216	0	0
g__Trametes	0	0	0.000191256	0	0	0
g__Pseudopithomyces	0.00189564	0	0	0.000311303	0	0.0323235
g__Nigrospora	0.0108417	0.0276414	0	0	0	0
g__Dendryphiella	0.0112076	0.0250955	0	0.0013386	0	0
g__Asterostroma	0	0.0139116	0	0	0	0
g__Favolus	0	0.0126387	0	0	0	0
g__Nigroporus	0	0.0126387	0	0	0	0
g__Eupenidiella	0	0.0118203	0	0	0	0
g__Penicillium	0	0.00936534	0	0.000124521	0	0
g__Meripilus	0	0.00750136	0	0	0	0
g__Saitozyma	0	0.00400073	0	0	0	0
g__Septoria	0	0.00272777	0	0	0	0
g__Didymella	0	4.54628e-05	0	0	0	0
g__Lentinus	0.000598623	0	0	0	0.00254943	0
g__Trichaptum	0	0	0	0	0.00187599	0
g__Clonostachys	0	0	0	0	0.00125066	0
g__Auricularia	0	0	0	0	0.000625331	0
g__Cordyceps	0	0	0	0.0037979	0	0
g__Neosetophoma	0.00981077	0	0	0.00155652	0	0
g__Clypeosphaerella	0.0127374	0	0	0.000747128	0	0
g__Elmerina	0.00492201	0	0	0.000715998	0	0
g__Galiicola	0.00565366	0	0	0.000529216	0	0
g__Moesziomyces	0.00409059	0	0	0.000435825	0	0
g__Meira	0.00236124	0	0	0.000404694	0	0
g__Sporobolomyces	0.00126376	0	0	0.000404694	0	0
g__Tzeanania	0.000399082	0	0	0.000373564	0	0
g__Aleurina	0.000266055	0	0	0.000342434	0	0
g__Coremiopassalora	0	0	0	0.000342434	0	0
g__Didymocyrtis	0.00738302	0	0	0.000311303	0	0
g__Coriolopsis	0	0	0	0.000249043	0	0
g__Bulleribasidium	0.00764907	0	0	0.000217912	0	0
g__Ustilaginaceae_gen_Incertae_sedis	0.00332568	0	0	0.000217912	0	0
g__Candida	0	0	0	0.000186782	0	0
g__Hyweljonesia	0	0	0	0.000186782	0	0
g__Lophiostoma	0.000864678	0	0	0.000155652	0	0
g__Pestalotiopsis	0	0	0	0.000155652	0	0
g__Pseudohelotium	0	0	0	0.000155652	0	0
g__Sympodiomycopsis	0	0	0	0.000155652	0	0
g__Cladophialophora	0.00412385	0	0	0.000124521	0	0
g__Xenodevriesia	0.00136353	0	0	0.000124521	0	0
g__Camarographium	0	0	0	0.000124521	0	0
g__Cyphellaceae_gen_Incertae_sedis	0	0	0	0.000124521	0	0
g__Dendryphion	0	0	0	0.000124521	0	0
g__Erysiphe	0	0	0	0.000124521	0	0
g__Scolecobasidium	0	0	0	0.000124521	0	0
g__Sirobasidium	0	0	0	0.000124521	0	0
g__Zygoascus	0	0	0	0.000124521	0	0
g__Microdochium	0.000931192	0	0	9.3391e-05	0	0
g__Choanephora	0	0	0	9.3391e-05	0	0
g__Coccomyces	0	0	0	9.3391e-05	0	0
g__Golubevia	0	0	0	9.3391e-05	0	0
g__Ophiosphaerella	0	0	0	6.22607e-05	0	0
g__Pseudohyaloseta	0	0	0	6.22607e-05	0	0
g__Symmetrospora	0	0	0	6.22607e-05	0	0
g__Fusarium	0.00615252	0	0	3.11303e-05	0	0
g__Vishniacozyma	0.00305963	0	0	3.11303e-05	0	0
g__Articulospora	0.00103096	0	0	3.11303e-05	0	0
g__Mycena	0	0	0	3.11303e-05	0	0
g__Pseudopestalotiopsis	0.00628554	0	0	0	0	0
g__Achroiostachys	0.0050883	0	0	0	0	0
g__Sarcinomyces	0.00495527	0	0	0	0	0
g__Zymoseptoria	0.00286009	0	0	0	0	0
g__Pseudozyma	0.00282683	0	0	0	0	0
g__Digitopodium	0.00266055	0	0	0	0	0
g__Pallidocercospora	0.00266055	0	0	0	0	0
g__Occultifur	0.00259403	0	0	0	0	0
g__Papiliotrema	0.00252752	0	0	0	0	0
g__Ceramothyrium	0.00242775	0	0	0	0	0
g__Tricellula	0.00232798	0	0	0	0	0
g__Ruinenia	0.00226147	0	0	0	0	0
g__Periconia	0.0019289	0	0	0	0	0
g__Paraphaeosphaeria	0.0016961	0	0	0	0	0
g__Calonectria	0.00152981	0	0	0	0	0
g__Cortinarius	0.00139679	0	0	0	0	0
g__Acanthocorticium	0.00133027	0	0	0	0	0
g__Diaporthe	0.00133027	0	0	0	0	0
g__Paraphoma	0.00129702	0	0	0	0	0
g__Microascus	0.0012305	0	0	0	0	0
g__Linosporopsis	0.00119725	0	0	0	0	0
g__Montagnula	0.00109748	0	0	0	0	0
g__Knufia	0.00106422	0	0	0	0	0
g__Toxicocladosporium	0.00106422	0	0	0	0	0
g__Daedaleopsis	0.000997705	0	0	0	0	0
g__Zeloasperisporium	0.000997705	0	0	0	0	0
g__Scytalidium	0.000964448	0	0	0	0	0
g__Botryobasidium	0.000931192	0	0	0	0	0
g__Kondoa	0.000931192	0	0	0	0	0
g__Meliola	0.000931192	0	0	0	0	0
g__Stereum	0.000831421	0	0	0	0	0
g__Begerowomyces	0.000764907	0	0	0	0	0
g__Lyomyces	0.000764907	0	0	0	0	0
g__Microbotryozyma	0.000764907	0	0	0	0	0
g__Rodwayella	0.000764907	0	0	0	0	0
g__Exophiala	0.000731651	0	0	0	0	0
g__Fellhanera	0.000731651	0	0	0	0	0
g__Bannoa	0.000698394	0	0	0	0	0
g__Neodevriesia	0.000665137	0	0	0	0	0
g__Cyanodermella	0.00063188	0	0	0	0	0
g__Carcinomyces	0.000565366	0	0	0	0	0
g__Trichosporon	0.000565366	0	0	0	0	0
g__Kordyana	0.000498853	0	0	0	0	0
g__Sterigmatomyces	0.000465596	0	0	0	0	0
g__Wickerhamomyces	0.000365825	0	0	0	0	0
g__Bullera	0.000299312	0	0	0	0	0
g__Cryptococcus	0.000232798	0	0	0	0	0
